# Supplementary material for: Myofibre Hyper-Contractility in Horses Expressing the Myosin Heavy Chain Myopathy Mutation, MYH1E321G
Source: MDPI journal article supplement (doi:10.3390/cells10123428), 2021-12-06
Supplement: s1 [file s1]

Supplementary Figure

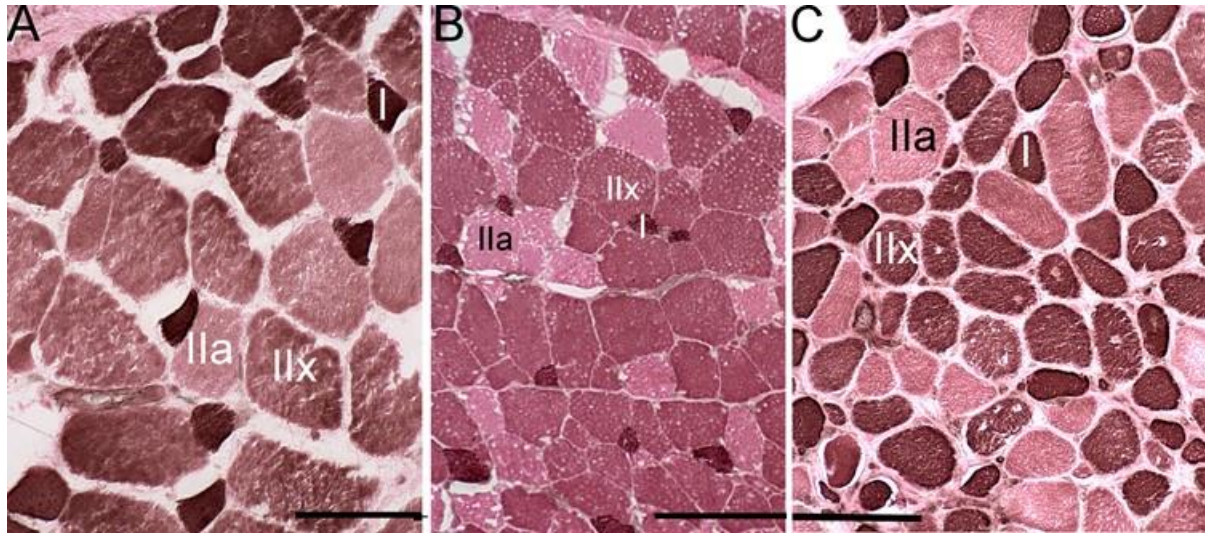

**Figure S1.** Myosin ATPase activity. Myosin ATPase activity (pre-incubation pH 4.4, eosin counterstain) of a cross-section of muscle from a control Quarter Horse (A), a heterozygote (B) and a horse homozygous for the *MYH1*<sup>E321G</sup> mutation (C). All horses were between 7 months and 1 year of age. Notable IIx fibre size variation was present in the horse homozygote for *MYH1*<sup>E321G</sup>.
